# Supplementary material
Source: PubMed Central journal article supplement (PMC6641508)
Supplement: ao7b01460_si_001.pdf [file ao7b01460_si_001.pdf]

# Supporting Information

## **PPh<sub>3</sub> Propeller Diastereomers. The Bonding Motif Ph<sub>PPh<sub>3</sub></sub> Face-on $\pi$ -Ar in Half-Sandwich Compounds [( $\pi$ -Ar)LL'MPPh<sub>3</sub>]**

Henri Brunner,<sup>\*,†</sup> Gábor Balázs,<sup>†</sup> Takashi Tsuno,<sup>\*,‡</sup> and Haruka Iwabe<sup>‡</sup>

<sup>†</sup> *Institut für Anorganische Chemie, Universität Regensburg, D-93040 Regensburg,  
Germany*

<sup>‡</sup> *Department of Applied Molecular Chemistry, College of Industrial Technology,  
Nihon University, Chiba 275-8575, Japan*

## Contents

|                                                                                                                                                                                                                                                                                                                   | page |
|-------------------------------------------------------------------------------------------------------------------------------------------------------------------------------------------------------------------------------------------------------------------------------------------------------------------|------|
| <b>Table S1.</b> Crystallographic data for the complexes.                                                                                                                                                                                                                                                         | S3   |
| <b>Table S2.</b> Rotation angles $\rho$ and angles $\varphi$ plane Ph/plane $\pi$ -Ar in diastereomers, $[(\pi\text{-Ar})\text{LL}'\text{MPPh}_3]$ , which only differ in the configuration of the $\text{PPh}_3$ ligand.                                                                                         | S4   |
| <b>Table S3.</b> Rotation angles $\rho$ and angles $\varphi$ plane Ph/plane $\pi$ -Ar for the 140 cases of the 119 compounds, $[(\pi\text{-C}_6\text{R}_6)\text{RuLL}'\text{PPh}_3]$ , which only differ in the configuration of the $\text{PPh}_3$ ligand. Only three-legged half-sandwich compounds considered. | S5   |
| <b>Table S4.</b> CH/ $\pi$ interactions between $\pi$ -Ar and Ph of the CHMePh substituent ( $\beta$ -phenyl effect) in the compounds $[(\pi\text{-C}_6\text{R}_6)\text{Ru}(\text{O-N})\text{PPh}_3]\text{PF}_6$ .                                                                                                | S8   |
| <b>Table S5.</b> Relative energy and torsion angle of the optimized geometries of the cations in HEDYIY and HEDYOE at the RI-B3LYP/def2-TZVP level of theory.                                                                                                                                                     | S9   |
| <b>Table S6.</b> Relative energy and torsion angle of the optimized geometries with restraints of the cation in HEDYIY at the RI-B3LYP/def2-TZVP level of theory.                                                                                                                                                 | S9   |
| <b>Table S7.</b> Cartesian coordinates of the optimized geometry of the cation in HEDYIY at the RI-B3LYP/def2-TZVP level of theory. Total Energy: -2072.84032804932 a.u                                                                                                                                           | S9   |
| <b>Table S8.</b> Cartesian coordinates of the optimized geometry of the cation in HEDYOE at the RI-B3LYP/def2-TZVP level of theory. Total Energy: -2072.84135001407 a.u.                                                                                                                                          | S12  |
| <b>Figure S1.</b> $^1\text{H}$ NMR spectrum of $(R_{\text{Ru}}, S_{\text{C}})/(S_{\text{Ru}}, S_{\text{C}})\text{-[CyRu(1O-2N)Cl]}$ in $\text{CDCl}_3$ .                                                                                                                                                          | S15  |
| <b>Figure S2.</b> $^1\text{H}$ NMR spectrum of $(R_{\text{Ru}}, S_{\text{C}})/(S_{\text{Ru}}, S_{\text{C}})\text{-[CyRu(2O-1N)Cl]}$ in $\text{CDCl}_3$ .                                                                                                                                                          | S15  |
| <b>Figure S3.</b> $^1\text{H}$ NMR spectrum of $(R_{\text{Ru}}, S_{\text{C}})/(S_{\text{Ru}}, S_{\text{C}})\text{-[CyRu(1O-2N)PPh}_3]\text{PF}_6$ in $\text{CDCl}_3$ .                                                                                                                                            | S16  |
| <b>Figure S4.</b> $^{31}\text{P}\{^1\text{H}\}$ NMR spectrum of $(R_{\text{Ru}}, S_{\text{C}})\text{-[CyRu(1O-2N)PPh}_3]\text{PF}_6$ and a small amount of $(S_{\text{Ru}}, S_{\text{C}})\text{-[CyRu(1O-2N)PPh}_3]\text{PF}_6$ in $\text{CDCl}_3$ .                                                              | S16  |
| <b>Figure S5.</b> $^1\text{H}$ NMR spectrum of $(R_{\text{Ru}}, S_{\text{C}})/(S_{\text{Ru}}, S_{\text{C}})\text{-[CyRu(2O-1N)PPh}_3]\text{PF}_6$ in $\text{CDCl}_3$ .                                                                                                                                            | S17  |
| <b>Figure S6.</b> $^{31}\text{P}\{^1\text{H}\}$ NMR spectrum of $(R_{\text{Ru}}, S_{\text{C}})\text{-[CyRu(2O-1N)PPh}_3]\text{PF}_6$ and a small amount of $(S_{\text{Ru}}, S_{\text{C}})\text{-[CyRu(2O-1N)PPh}_3]\text{PF}_6$ in $\text{CDCl}_3$ .                                                              | S17  |

**Table S1.** Crystallographic data for the complexes

| Complex                                          | $(R_{Ru}, S_C)$ -[CyRu(1O-2N)Cl]       | $(R_{Ru}, S_C)$ -[CyRu(1O-2N)PPh <sub>3</sub> ]PF <sub>6</sub> | $(R_{Ru}, S_C)$ -[CyRu(2O-1N)PPh <sub>3</sub> ]PF <sub>6</sub>                               |
|--------------------------------------------------|----------------------------------------|----------------------------------------------------------------|----------------------------------------------------------------------------------------------|
| Empirical formula                                | C <sub>29</sub> H <sub>30</sub> ClNORu | 3(C <sub>47</sub> H <sub>45</sub> NOPRu),3(F <sub>6</sub> P)   | C <sub>47</sub> H <sub>45</sub> NOPRu, F <sub>6</sub> P, 2(CH <sub>2</sub> Cl <sub>2</sub> ) |
| Formula weight                                   | 545.06                                 | 916.85                                                         | 1001.78                                                                                      |
| Crystal system                                   | orthorhombic                           | monoclinic                                                     | monoclinic                                                                                   |
| Space group                                      | $P2_12_12_1$                           | $P2_1$                                                         | $P2_1$                                                                                       |
| $a$ (Å)                                          | 9.044(3)                               | 10.50060(10)                                                   | 10.429(5)                                                                                    |
| $b$ (Å)                                          | 13.524(3)                              | 17.86340(10)                                                   | 16.431(5)                                                                                    |
| $c$ (Å)                                          | 20.436(5)                              | 34.44680(10)                                                   | 14.060(5)                                                                                    |
| $\alpha$ (°)                                     | 90                                     | 90                                                             | 90                                                                                           |
| $\beta$ (°)                                      | 90                                     | 98.100(1)                                                      | 98.590(5)                                                                                    |
| $\gamma$ (°)                                     | 90                                     | 90                                                             | 90                                                                                           |
| $V$ (Å <sup>3</sup> )                            | 2499.4(12)                             | 6396.99(7)                                                     | 2382.3(16)                                                                                   |
| $Z$                                              | 4                                      | 2                                                              | 2                                                                                            |
| $\rho_{\text{calcd}}$ (mg/m <sup>3</sup> )       | 1.449                                  | 1.428                                                          | 1.515                                                                                        |
| Abs coeff (mm <sup>-1</sup> )                    | 0.756                                  | 4.219                                                          | 0.567                                                                                        |
| Abs correct                                      | multi-scan                             | multi-scan                                                     | multi-scan                                                                                   |
| Transmiss max/min                                | 1.0000/0.7317                          | 1.0000/0.46716                                                 | 1.0000/ 0.7749                                                                               |
| $F(000)$                                         | 1120                                   | 2850                                                           | 1108                                                                                         |
| Crystal size (mm)                                | 0.36 x 0.32 x 0.27                     | 0.19 x 0.06 x 0.02                                             | 0.51 x 0.38 x 0.20                                                                           |
| Radiation (Å)                                    | Mo K $\alpha$ /0.71073                 | Cu K $\alpha$ /1.54184                                         | Mo K $\alpha$ /0.71073                                                                       |
| $\theta$ range (°)                               | 3.01- 27.48                            | 3.5650-66.5840                                                 | 3.17-27.48                                                                                   |
| Rflns/unique                                     | 19688/4388                             | 48030/21912                                                    | 18634/8291                                                                                   |
| $R_{\text{int}}$                                 | 0.037                                  | 0.0318                                                         | 0.0334                                                                                       |
| Data/params                                      | 4392/298                               | 21912/1567                                                     | 8291/578                                                                                     |
| Goodness of fit $F^2$                            | 1.065                                  | 1.012                                                          | 1.057                                                                                        |
| $R_1/wR_2$ ( $I > 2\sigma(I)$ )                  | 0.0325/0.0875                          | 0.0414/0.1086                                                  | 0.0561/0.1479                                                                                |
| $R_1/wR_2$ (all data)                            | 0.0335/0.0885                          | 0.0427/0.1100                                                  | 0.0600/0.1519                                                                                |
| Largest diff. peak and hole (e Å <sup>-3</sup> ) | 2.300/-0.519                           | 1.259/ -0.798                                                  | 2.326/-0.605                                                                                 |
| Flack-Parameter                                  | -0.004(14)                             | -0.014(3)                                                      | -0.029(14)                                                                                   |
| CCDC No.                                         | 1519530                                | 1519531                                                        | 1519532                                                                                      |

**Table S2.** Rotation angles  $\rho$  and angles  $\varphi$  plane Ph/plane  $\pi$ -Ar in diastereomers,  $[(\pi\text{-Ar})\text{LL}'\text{MPPH}_3]$ , which only differ in the configuration of the  $\text{PPh}_3$  ligand

| CSD symbol<br>or CCDC<br>number <sup>a</sup><br>(ref.) | Formula                                                                                                  | Ph face-on $\pi$ -Ar                                                     |                                                                    |                                                                                       | Ph edge-on $\pi$ -Ar                                                     |                                                                    |                                                                                       |
|--------------------------------------------------------|----------------------------------------------------------------------------------------------------------|--------------------------------------------------------------------------|--------------------------------------------------------------------|---------------------------------------------------------------------------------------|--------------------------------------------------------------------------|--------------------------------------------------------------------|---------------------------------------------------------------------------------------|
|                                                        |                                                                                                          | $\text{C}_i\text{-P-M-}$<br>$\text{Ar}_{\text{cent}}$<br>$\rho / ^\circ$ | $\text{C}_o\text{-C}_i\text{-P-}$<br>$\text{M}$<br>$\tau / ^\circ$ | plane<br>$\text{Ph}_{\text{face}}/$<br>plane $\pi$ -<br>$\text{Ar } \varphi / ^\circ$ | $\text{C}_i\text{-P-M-}$<br>$\text{Ar}_{\text{cent}}$<br>$\rho / ^\circ$ | $\text{C}_o\text{-C}_i\text{-P-}$<br>$\text{M}$<br>$\tau / ^\circ$ | plane<br>$\text{Ph}_{\text{edge}}/$<br>plane $\pi$ -<br>$\text{Ar } \varphi / ^\circ$ |
| HEDYIY<br>(1)                                          | $(R_{\text{Ru}}, S_{\text{C}})-[(\pi\text{-C}_6\text{H}_6)\text{Ru}(\text{O-N})\text{PPh}_3]\text{PF}_6$ | 37.3                                                                     | 53.7                                                               | 27.6                                                                                  | -82.4                                                                    | 23.9                                                               | 58.2                                                                                  |
| HEDYOE<br>(1)                                          | $(R_{\text{Ru}}, S_{\text{C}})-[(\pi\text{-C}_6\text{H}_6)\text{Ru}(\text{O-N})\text{PPh}_3]\text{PF}_6$ | -28.7                                                                    | -62.1                                                              | 28.6                                                                                  | 89.2                                                                     | -16.0                                                              | 51.2                                                                                  |
| 1519532                                                | $(R_{\text{Ru}}, S_{\text{C}})-[\text{CyRu}(2\text{O-1N})\text{PPh}_3]\text{PF}_6$                       | 35.2                                                                     | 44.3                                                               | 26.8                                                                                  | -86.0                                                                    | 25.6                                                               | 67.2                                                                                  |
| 1519531 [1]                                            | $(R_{\text{Ru}}, S_{\text{C}})-[\text{CyRu}(1\text{O-2N})\text{PPh}_3]\text{PF}_6$                       | 45.5                                                                     | 44.7                                                               | 17.3                                                                                  | -80.6                                                                    | 6.4                                                                | 50.6                                                                                  |
| 1519531 [2]                                            | $(R_{\text{Ru}}, S_{\text{C}})-[\text{CyRu}(1\text{O-2N})\text{PPh}_3]\text{PF}_6$                       | 47.0                                                                     | 44.0                                                               | 17.8                                                                                  | -76.7                                                                    | 14.2                                                               | 58.8                                                                                  |
| 1519531 [3]                                            | $(R_{\text{Ru}}, S_{\text{C}})-[\text{CyRu}(1\text{O-2N})\text{PPh}_3]\text{PF}_6$                       | -33.2                                                                    | -69.5                                                              | 18.2                                                                                  | 87.3                                                                     | -25.2                                                              | 66.0                                                                                  |
| VOWTUW[1]<br>(2)                                       | $[\text{CpFe}\{\text{CO}(\text{C}=\text{CH}_2)\text{-OBn}\}(\text{CO})\text{PPh}_3]$                     | -36.8                                                                    | -65.7                                                              | 25.9                                                                                  | 82.7                                                                     | -3.1                                                               | 39.4                                                                                  |
| VOWTUW[2]<br>(2)                                       | $[\text{CpFe}\{\text{CO}(\text{C}=\text{CH}_2)\text{-OBn}\}(\text{CO})\text{PPh}_3]$                     | 38.8                                                                     | 55.0                                                               | 23.5                                                                                  | -81.1                                                                    | 12.1                                                               | 48.0                                                                                  |
| GIRYIP[1] (3)                                          | $[\text{CpFe}(\text{C}_4\text{F}_5)(\text{CO})\text{PPh}_3]$                                             | 64.1                                                                     | 14.3                                                               | 34.8                                                                                  | -57.3                                                                    | 39.5                                                               | 87.9                                                                                  |
| GIRYIP[2] (3)                                          | $[\text{CpFe}(\text{C}_4\text{F}_5)(\text{CO})\text{PPh}_3]$                                             | 33.4                                                                     | 63.7                                                               | 27.9                                                                                  | -85.7                                                                    | 10.2                                                               | 44.5                                                                                  |
| ZINXOJ[1] (4)                                          | $[\text{CpRe}\{\text{S}(\text{CH}_2\text{CH}=\text{CH}_2)_2\}(\text{NO})\text{PPh}_3]\text{SbF}_6$       | 42.6                                                                     | 32.1                                                               | 26.1                                                                                  | -75.7                                                                    | 63.7                                                               | 79.1                                                                                  |
| ZINXOJ[2]<br>(4)                                       | $[\text{CpRe}\{\text{S}(\text{CH}_2\text{CH}=\text{CH}_2)_2\}(\text{NO})\text{PPh}_3]\text{SbF}_6$       | -31.5                                                                    | -62.3                                                              | 38.8                                                                                  | 87.2                                                                     | -38.8                                                              | 67.3                                                                                  |
| FOMZEN[1]<br>(5)                                       | $[\text{CpFe}(\text{CNBPh}_3)(\text{CO})\text{-PPh}_3]$                                                  | -42.5                                                                    | -53.3                                                              | 21.6                                                                                  | 79.2                                                                     | -14.9                                                              | 48.9                                                                                  |
| FOMZEN[2]<br>(5)                                       | $[\text{CpFe}(\text{CNBPh}_3)(\text{CO})\text{-PPh}_3]$                                                  | 36.7                                                                     | 67.3                                                               | 34.5                                                                                  | -83.7                                                                    | 7.4                                                                | 45.1                                                                                  |
| RCMXFE[1]<br>(6)                                       | $[\text{CpFe}\{\text{COO}(\text{C}_{10}\text{H}_{19})\}\text{-}(\text{CO})\text{PPh}_3]$                 | 43.2                                                                     | 55.1                                                               | 16.2                                                                                  | -76.8                                                                    | 12.1                                                               | 45.8                                                                                  |
| RCMXFE[2]<br>(6)                                       | $[\text{CpFe}\{\text{COO}(\text{C}_{10}\text{H}_{19})\}\text{-}(\text{CO})\text{PPh}_3]$                 | -40.8                                                                    | -53.4                                                              | 13.7                                                                                  | 80.5                                                                     | -14.7                                                              | 51.1                                                                                  |
| SEPZUI[1,2]<br>(7)                                     | $[\text{CpRu}(\text{IC}_6\text{H}_4\text{Me-}p)\text{-}(\text{CO})\text{PPh}_3]\text{PF}_6$              | -44.4                                                                    | -51.9                                                              | 20.9                                                                                  | 74.3                                                                     | -8.9                                                               | 44.2                                                                                  |

<sup>a</sup>Brackets [] indicate independent molecules.

**Table S3.** Rotation angles  $\rho$  and angles  $\varphi$  plane Ph/plane  $\pi$ -Ar for the 140 cases of the 119 compounds,  $[(\pi\text{-C}_6\text{R}_6)\text{RuLL}'\text{PPh}_3]$ , which only differ in the configuration of the  $\text{PPh}_3$  ligand. Only three-legged half-sandwich compounds considered.

| Entry | CSD Symbol <sup>a</sup> | Ph <sub>face</sub> -on $\pi$ -Ar                          |                                                        |                                                                     | Ph <sub>edge</sub> -on $\pi$ -Ar                          |                                                        |                                                                     |
|-------|-------------------------|-----------------------------------------------------------|--------------------------------------------------------|---------------------------------------------------------------------|-----------------------------------------------------------|--------------------------------------------------------|---------------------------------------------------------------------|
|       |                         | C <sub>i</sub> -P-M-Ar <sub>cent</sub><br>$\rho / ^\circ$ | C <sub>o</sub> -C <sub>i</sub> -P-M<br>$\tau / ^\circ$ | plane Ph <sub>face</sub> /<br>plane $\pi$ -Ar<br>$\varphi / ^\circ$ | C <sub>i</sub> -P-M-Ar <sub>cent</sub><br>$\rho / ^\circ$ | C <sub>o</sub> -C <sub>i</sub> -P-M<br>$\tau / ^\circ$ | plane Ph <sub>edge</sub> /<br>plane $\pi$ -Ar<br>$\varphi / ^\circ$ |
| 1     | NEZKOT[1]               | -59.193                                                   | -84.91                                                 | 45.708                                                              | 62.228                                                    | 46.035                                                 | 4.257                                                               |
| 2     | GIZMUY                  | -55.649                                                   | -61.41                                                 | 8.194                                                               | 65.846                                                    | -3.078                                                 | 56.864                                                              |
| 3     | DITNID(1)               | -55.634                                                   | -22.249                                                | 27.409                                                              | 61.272                                                    | 70.159                                                 | 39.371                                                              |
| 4     | NEZKOT[2]               | -54.837                                                   | -82.745                                                | 41.227                                                              | 62.834                                                    | 35.449                                                 | 13.515                                                              |
| 5     | HESHAP[2]               | -54.154                                                   | 85.321                                                 | 46.943                                                              | 64.811                                                    | 41.675                                                 | 6.697                                                               |
| 6     | SIGKEZ(1)               | -53.992                                                   | -72.808                                                | 35.882                                                              | 62.11                                                     | 21.912                                                 | 22.749                                                              |
| 7     | QENJUO                  | -53.279                                                   | -61.244                                                | 27.638                                                              | 63.267                                                    | 9.335                                                  | 36.853                                                              |
| 8     | LIRDEW                  | -53.176                                                   | -74.038                                                | 34.949                                                              | 64.963                                                    | 23.813                                                 | 22.404                                                              |
| 9     | YUTKON                  | -50.193                                                   | 77.453                                                 | 47.697                                                              | 68.061                                                    | 18.331                                                 | 28.728                                                              |
| 10    | ESOLUT(1)               | -50.074                                                   | -72.851                                                | 31.491                                                              | 66.459                                                    | 12.086                                                 | 29.882                                                              |
| 11    | WAKXUB(2)               | -50.019                                                   | -76.357                                                | 41.363                                                              | 67.175                                                    | 10.931                                                 | 27.542                                                              |
| 12    | WUVMAD                  | -49.524                                                   | -36.168                                                | 16.749                                                              | 70.404                                                    | -17.083                                                | 57.63                                                               |
| 13    | NEZJIM                  | -46.889                                                   | -48.217                                                | 17.336                                                              | 72.396                                                    | -4.243                                                 | 54.473                                                              |
| 14    | SIGJUO                  | -46.573                                                   | -63.872                                                | 28.046                                                              | 67.914                                                    | -3.44                                                  | 45.012                                                              |
| 15    | WUVMOR                  | -46.348                                                   | -41.141                                                | 16.361                                                              | 73.436                                                    | -25.137                                                | 68.144                                                              |
| 16    | TEYZOM                  | -46.234                                                   | -63.366                                                | 31.13                                                               | 71.968                                                    | 14.989                                                 | 28.447                                                              |
| 17    | SIGJOI                  | -46.179                                                   | -77.246                                                | 33.769                                                              | 70.461                                                    | 13.344                                                 | 28.339                                                              |
| 18    | VICZOW                  | -45.525                                                   | -62.972                                                | 20.349                                                              | 73.144                                                    | -2.235                                                 | 44.964                                                              |
| 19    | EHABEU                  | -45.099                                                   | -80.29                                                 | 32.795                                                              | 74.764                                                    | 16.096                                                 | 26.688                                                              |
| 20    | BEDNII                  | -44.73                                                    | -74.678                                                | 36.472                                                              | 73.037                                                    | 21.164                                                 | 20.714                                                              |
| 21    | PEHHOB[2]               | -44.607                                                   | -54.613                                                | 18.022                                                              | 77.002                                                    | 1.299                                                  | 41.181                                                              |
| 22    | PEHJET[1]               | -44.588                                                   | -55.781                                                | 17.963                                                              | 77.232                                                    | 2.807                                                  | 40.273                                                              |
| 23    | HIZNIN(2)               | -43.93                                                    | -50.162                                                | 21.196                                                              | 74.259                                                    | -2.489                                                 | 41.917                                                              |
| 24    | VIQQOB                  | -43.792                                                   | -67.564                                                | 20.8                                                                | 76.719                                                    | 9.789                                                  | 37.532                                                              |
| 25    | WAKXUB(1)               | -43.309                                                   | -59.457                                                | 28.888                                                              | 71.221                                                    | -7.79                                                  | 46.704                                                              |
| 26    | ZESRUK                  | -43.228                                                   | -64.888                                                | 34.182                                                              | 74.437                                                    | 5.103                                                  | 33.124                                                              |
| 27    | MACVAO                  | -42.979                                                   | -62.763                                                | 24.392                                                              | 74.933                                                    | 2.128                                                  | 36.576                                                              |
| 28    | BULDIW                  | -42.123                                                   | -58.955                                                | 26.731                                                              | 76.671                                                    | -7.469                                                 | 46.175                                                              |
| 29    | ESOLUT(2)               | -42.014                                                   | -63.279                                                | 26.317                                                              | 76.924                                                    | -64.189                                                | 77.214                                                              |
| 30    | XOSWUY                  | -41.721                                                   | -63.284                                                | 30.087                                                              | 76.199                                                    | 1.685                                                  | 42.828                                                              |
| 31    | ECIQAJ                  | -41.666                                                   | -65.405                                                | 38.421                                                              | 75.919                                                    | 11.713                                                 | 30.479                                                              |

|    |             |         |         |        |          |         |        |
|----|-------------|---------|---------|--------|----------|---------|--------|
| 32 | TUKYAB      | -41.472 | -66.908 | 26.144 | 77.159   | 7.967   | 33.699 |
| 33 | AMEJEH      | -41.22  | -73.532 | 33.262 | 75.812   | 9.562   | 29.811 |
| 34 | IKEKOY[2]   | -41.033 | -60.149 | 23.332 | 75.68    | -3.135  | 40.938 |
| 35 | RIRDUS      | -41.005 | -40.947 | 26.636 | 80.215   | -27.094 | 66.857 |
| 36 | SIGKEZ(2)   | -40.078 | -70.334 | 32.985 | 80.86    | -62.566 | 77.094 |
| 37 | TOPCUW      | -39.751 | -48.954 | 20.178 | 80.449   | -28.285 | 64.371 |
| 38 | OVUFUI      | -39.517 | -52.025 | 17.376 | 82.481   | -32.482 | 74.131 |
| 39 | YOGDOO      | -39.338 | -53.547 | 18.552 | 80.987   | -9.718  | 53.027 |
| 40 | FOKVUY      | -38.324 | -44.41  | 23.969 | 83.52    | -3.353  | 45.553 |
| 41 | TIPXIA      | -36.569 | -70.587 | 38.502 | 79.436   | 2.387   | 35.075 |
| 42 | NABXAQ      | -36.283 | -57.832 | 23.868 | 85.283   | -9.29   | 47.3   |
| 43 | TOPCOQ[1]   | -34.609 | -58.99  | 27.26  | 83.559   | -15.425 | 53.015 |
| 44 | JUCNAW      | -34.581 | -53.541 | 22.743 | 87.667   | -21.305 | 58.122 |
| 45 | LOMXER      | -34.262 | -59.267 | 25.107 | 87.131   | 5.407   | 35.437 |
| 46 | PAWJAY      | -33.94  | -53.165 | 21.599 | 86.023   | -18.351 | 59.96  |
| 47 | PEQTUC      | -32.718 | -60.301 | 28.384 | 85.599   | -25.804 | 59.879 |
| 48 | VOTYUY10[1] | -32.448 | -76.404 | 27.804 | 84.984   | -29.698 | 67.907 |
| 49 | ZUQNII      | -32.091 | -49.895 | 20.668 | 88.302   | -23.668 | 59.757 |
| 50 | TOPCOQ[2]   | -31.844 | -58.925 | 21.973 | 87.206   | -22.093 | 59.281 |
| 51 | IKEKUE[2]   | -31.34  | -55.186 | 20.485 | 88.088   | -48.97  | 85.932 |
| 52 | IMUDEZ      | -30.833 | -53.639 | 24.374 | 82.976   | -17.175 | 55.225 |
| 53 | NUHTEQ      | -30.498 | -56.048 | 20.706 | 88.87    | -18.803 | 53.855 |
| 54 | PAWHUQ      | -29.921 | -51.392 | 25.109 | 89.779   | -18.287 | 60.341 |
| 55 | HEDYOE      | -28.739 | -62.078 | 28.602 | 89.289   | -15.964 | 51.235 |
| 56 | FUZCAG      | -27.613 | -85.708 | 30.004 | 90.051   | -39.207 | 76.399 |
| 57 | ZOJYEE      | -27.123 | -53.376 | 22.913 | 93.975   | -31.232 | 67.591 |
| 58 | ZOJXUT      | -26.379 | -48.565 | 27.736 | 94.637   | -40.221 | 78.805 |
| 59 | ZOJYAA      | -25.74  | -56.778 | 23.805 | 94.857   | -31.954 | 71.074 |
| 60 | IMUDOJ      | -25.389 | -64.189 | 28.49  | 87.455   | -13.999 | 50.402 |
| 61 | DITNID(2)   | -25.142 | -74.768 | 26.43  | 91.992   | -34.255 | 70.389 |
| 62 | WAKNII      | -24.328 | -48.548 | 29.735 | 98.536   | -22.856 | 65.342 |
| 63 | IMUDID      | -24.11  | -64.971 | 28.773 | 88.945   | -18.622 | 53.579 |
| 64 | GIKNOE      | -23.677 | -55.995 | 27.035 | 96.796   | -32.261 | 71.015 |
| 65 | MOQSAO      | -17.257 | -58.514 | 28.671 | 102.07   | -44.98  | 80.732 |
| 66 | MUCXAJ(1)   | -16.661 | -76.041 | 34.926 | 98.983   | -40.125 | 73.98  |
| 67 | VAKFIX(1)   | -15.158 | -85.028 | 35.804 | 100.425  | -35.508 | 71.995 |
| 68 | DITNEZ(1)   | 12.866  | 66.08   | 30.564 | -103.741 | 45.869  | 82.236 |
| 69 | LOMXAN      | 17.046  | 66.048  | 29.743 | -103.346 | 19.715  | 52.945 |
| 70 | HIZNIN(1)   | 20.088  | 74.047  | 26.761 | -96.253  | 46.167  | 82.155 |
| 71 | MIMHEW[1]   | 21.931  | 78.52   | 29.329 | -95.555  | 29.333  | 68.795 |
| 72 | YOGFIK      | 23.482  | 47.938  | 30.109 | -98.46   | 20.849  | 68.818 |
| 73 | ZOJYOO      | 25.817  | 56.395  | 23.498 | -95.072  | 32.62   | 72.212 |

|     |              |        |         |        |         |         |        |
|-----|--------------|--------|---------|--------|---------|---------|--------|
| 74  | LUKPIR       | 26.426 | 49.912  | 28.438 | -92.461 | 41.24   | 74.952 |
| 75  | FAPSEV       | 27.316 | 50.958  | 26.966 | -92.725 | 28.887  | 65.028 |
| 76  | LIZZIE       | 28.294 | 62.699  | 32.936 | -88.018 | -3.405  | 42.718 |
| 77  | YOGFOQ       | 29.025 | 50.767  | 25.553 | -92.898 | 27.316  | 69.457 |
| 78  | FAPSUL       | 29.384 | 50.823  | 24.563 | -90.803 | 39.484  | 73.47  |
| 79  | MIMHEW[2]    | 29.435 | 80.324  | 31.802 | -89.555 | 7.478   | 50.868 |
| 80  | WEQHAD(2)    | 29.95  | 59.016  | 22.017 | -88.623 | 65.529  | 73.865 |
| 81  | MUNVEW       | 30.661 | 66.601  | 25.113 | -84.126 | 35.65   | 67.521 |
| 82  | KIVLUY       | 31.531 | 69.629  | 23.459 | -87.459 | 0.048   | 40.801 |
| 83  | NEZJOS       | 31.664 | 57.157  | 24.086 | -87.652 | -0.071  | 46.413 |
| 84  | YOGCON       | 31.814 | 70.091  | 24.456 | -84.256 | 10.705  | 49.853 |
| 85  | XAWPOA       | 32.582 | 76.908  | 26.448 | -82.689 | 16.916  | 54.356 |
| 86  | BULDES       | 32.928 | 71.079  | 36.151 | -87.112 | 9.747   | 44.468 |
| 87  | FUZBUZ       | 32.933 | -83.651 | 39.065 | -85.184 | 47.543  | 87.343 |
| 88  | NEZKEJ       | 33.326 | 49.635  | 21.895 | -91.074 | 18.681  | 62.982 |
| 89  | MABKUW[2](2) | 33.91  | 64.838  | 24.788 | -80.331 | 19.642  | 54.997 |
| 90  | IKEKUE[1]    | 33.941 | 55.352  | 20.205 | -85.32  | 41.616  | 76.582 |
| 91  | KADVER       | 34.094 | 72.823  | 35.679 | -81.029 | 13.498  | 46.246 |
| 92  | DITNEZ(2)    | 34.163 | 56.994  | 16.37  | -84.549 | 8.627   | 46.385 |
| 93  | YOGDAA       | 34.877 | 57.254  | 18.678 | -84.039 | 13.802  | 59.1   |
| 94  | ECIPUC       | 36.525 | 67.349  | 34.262 | -79.578 | 12.457  | 51.967 |
| 95  | MABKUW[1](1) | 36.661 | 70.176  | 26.883 | -76.405 | 10.857  | 48.033 |
| 96  | GAQDAE       | 37.011 | 65.53   | 14.705 | -84.025 | 10.262  | 54.635 |
| 97  | LIZZOK       | 37.284 | 54.263  | 24.542 | -80.868 | 6.877   | 49.048 |
| 98  | GIZMOS       | 37.339 | 56.334  | 24.499 | -82.321 | 6.786   | 55.414 |
| 99  | HEDYIY       | 37.341 | 53.703  | 27.625 | -82.424 | 23.893  | 58.178 |
| 100 | VIQRES       | 38.204 | 71.361  | 18.688 | -81.579 | 9.552   | 50.582 |
| 101 | NEPRAC       | 39.267 | 74.199  | 35.745 | -77.974 | -2.195  | 33.424 |
| 102 | MUCXAJ(2)    | 40.978 | 51.933  | 21.601 | -75.061 | 47.277  | 84.756 |
| 103 | LOMWOA       | 41.181 | 57.242  | 23.836 | -79.129 | 0.506   | 41.597 |
| 104 | AQAYIA       | 41.613 | 67.56   | 32.039 | -77.141 | -15.078 | 25.571 |
| 105 | IKEKOY[1]    | 42.141 | 64.797  | 26.566 | -73.998 | -3.044  | 35.789 |
| 106 | WEQHAD(1)    | 42.217 | 55.424  | 19.553 | -76.638 | 1.004   | 41.436 |
| 107 | NEZJUY       | 42.743 | 49.139  | 15.834 | -79.895 | 7.219   | 53.297 |
| 108 | YUSWUE       | 42.977 | 46.366  | 20.538 | -79.257 | 12.701  | 55.308 |
| 109 | AXIVEI[1]    | 43.135 | 65.513  | 24.111 | -74.143 | -8.487  | 31.836 |
| 110 | TOLVEV[1]    | 43.823 | 53.827  | 27.473 | -71.481 | 4.889   | 39.57  |
| 111 | DITZIR       | 44.216 | 60.929  | 36.099 | -70.107 | 12.086  | 48.175 |
| 112 | NEZKAF       | 44.282 | 42.17   | 20.171 | -76.95  | 12.401  | 55.325 |
| 113 | ZESSAR       | 44.506 | 54.028  | 19.133 | -74.93  | -1.998  | 39.763 |
| 114 | VIJREL       | 45.293 | 55.289  | 12.556 | -73.829 | -2.689  | 44.803 |
| 115 | YEBDOY       | 45.694 | 59.759  | 11.938 | -77.185 | -4.492  | 44.94  |

|     |              |        |         |        |         |         |        |
|-----|--------------|--------|---------|--------|---------|---------|--------|
| 116 | PEHHOB[1]    | 45.932 | 75.475  | 35.372 | -72.698 | -20.666 | 20.688 |
| 117 | AXIVEI[2]    | 46.089 | 65.21   | 24.828 | -72.229 | -1.013  | 43.476 |
| 118 | GIRMAX       | 46.126 | 57.542  | 15.417 | -76.881 | -10.775 | 33.238 |
| 119 | GILQOI       | 46.129 | 49.38   | 14.341 | -76.391 | -2.206  | 44.837 |
| 120 | PEHJET[2]    | 46.236 | 75.928  | 36.661 | -72.529 | -22.302 | 19.796 |
| 121 | ECIQOX       | 46.289 | 68.776  | 29.419 | -73.067 | -17.657 | 27.704 |
| 122 | KEKFOV       | 46.565 | 54.579  | 10.925 | -74.191 | -3.103  | 45.9   |
| 123 | RUJHOT       | 46.616 | 63.144  | 22.349 | -74.907 | 9.972   | 54.241 |
| 124 | MUNGEH       | 46.629 | 62.535  | 17.017 | -75.286 | -9.769  | 41.903 |
| 125 | JEXFAU       | 46.639 | 75.527  | 31.856 | -69.499 | -2.877  | 36.415 |
| 126 | TOLVEV[2]    | 47.659 | 56.779  | 28.893 | -67.762 | 0.469   | 36.447 |
| 127 | JEXDUM       | 47.78  | 60.335  | 26.741 | -66.418 | -8.53   | 34.722 |
| 128 | UCODUM       | 47.892 | -76.348 | 52.987 | -70.68  | -33.265 | 7.963  |
| 129 | VOTYUY10[2]  | 48.005 | 51.258  | 20.303 | -74.051 | 1.531   | 44.088 |
| 130 | VIQRUI       | 48.371 | 49.903  | 11.958 | -74.582 | 1.734   | 49.092 |
| 131 | PEHJAP       | 48.433 | 74.07   | 34.55  | -72.114 | -15.901 | 29.323 |
| 132 | HIVWOY       | 48.501 | 53.763  | 21.538 | -69.796 | -1.883  | 35.56  |
| 133 | BONXAD       | 48.522 | 65.647  | 12.109 | -72.994 | -4.389  | 41.534 |
| 134 | JEXDOG       | 49.927 | 61.583  | 16.337 | -67.13  | 25.543  | 64.352 |
| 135 | MABKUW[1](2) | 50.871 | 66.092  | 27.136 | -64.373 | -3.489  | 37.813 |
| 136 | TOLVIZ       | 51.065 | 71.014  | 38.638 | -64.145 | -11.545 | 25.658 |
| 137 | VAKFIX(2)    | 53.115 | 40.208  | 20.457 | -64.232 | 14.072  | 55.35  |
| 138 | MABKUW[2](1) | 53.28  | 70.566  | 32.166 | -59.477 | -10.175 | 32.754 |
| 139 | XOSWOS       | 53.684 | 69.646  | 32.051 | -65.4   | -20.733 | 28.022 |
| 140 | HESHAP[1]    | 53.766 | 81.436  | 41.884 | -66.238 | -36.44  | 10.777 |

<sup>a</sup>Brackets [] indicate independent molecules and parentheses () different ligands in the same molecule.

**Table S4.** CH/ $\pi$  interactions between  $\pi$ -Ar and Ph of the CHMePh substituent ( $\beta$ -phenyl effect) in the compounds  $[(\pi\text{-C}_6\text{R}_6)\text{Ru}(\text{O-N})\text{PPh}_3]\text{PF}_6$

| Entry<br>( <i>ref.</i> ) | CSD symbol <sup>a</sup><br>CCDC<br>number | Formula                                                                                                  | ArCH-C <sub><i>i</i>0</sub> (Å)                                                                 |
|--------------------------|-------------------------------------------|----------------------------------------------------------------------------------------------------------|-------------------------------------------------------------------------------------------------|
| 1 ( <i>l</i> )           | HEDYIY                                    | $(R_{\text{Ru}}, S_{\text{C}})-[(\pi\text{-C}_6\text{H}_6)\text{Ru}(\text{O-N})\text{PPh}_3]\text{PF}_6$ | H-C <sub><i>i</i></sub> : 2.93, H-C <sub><i>o</i></sub> : 2.79                                  |
| 2 ( <i>l</i> )           | HEDYOE                                    | $(R_{\text{Ru}}, S_{\text{C}})-[(\pi\text{-C}_6\text{H}_6)\text{Ru}(\text{O-N})\text{PPh}_3]\text{PF}_6$ | H-C <sub><i>i</i></sub> : 2.56, H-C <sub><i>o</i></sub> : 2.75, H-C <sub><i>o'</i></sub> : 2.96 |
| 3                        | 1519532                                   | $(R_{\text{Ru}}, S_{\text{C}})-[\text{CyRu}(\text{2O-1N})\text{PPh}_3]\text{PF}_6$                       | H-C <sub><i>i</i></sub> : 2.81                                                                  |
| 4                        | 1519531[1]                                | $(R_{\text{Ru}}, S_{\text{C}})-[\text{CyRu}(\text{1O-2N})\text{PPh}_3]\text{PF}_6$                       | H-C <sub><i>i</i></sub> : 2.86 H-C <sub><i>o</i></sub> : 2.54                                   |
| 5                        | 1519531[2]                                | $(R_{\text{Ru}}, S_{\text{C}})-[\text{CyRu}(\text{1O-2N})\text{PPh}_3]\text{PF}_6$                       | H-C <sub><i>i</i></sub> : 2.64, H-C <sub><i>o</i></sub> : 2.93, H-C <sub><i>o'</i></sub> : 2.99 |
| 6                        | 1519531[3]                                | $(R_{\text{Ru}}, S_{\text{C}})-[\text{CyRu}(\text{1O-2N})\text{PPh}_3]\text{PF}_6$                       | H-C <sub><i>i</i></sub> : 2.58, H-C <sub><i>o</i></sub> : 2.76, H-C <sub><i>o'</i></sub> : 2.89 |

<sup>a</sup>Brackets indicate independent molecules [1], [2], and [3].



**Table S5.** Relative energy and torsion angle of the optimized geometries of the cations in HEDYIY and HEDYOE at the RI-B3LYP/def2-TZVP level of theory

|                                                   | HEDYIY | HEDYOE |
|---------------------------------------------------|--------|--------|
| Relative energy / $\text{kJ}\cdot\text{mol}^{-1}$ | 2.68   | 0      |
| $\rho / ^\circ$                                   | 47.4   |        |

**Table S6.** Relative energy and torsion angle of the optimized geometries with restraints of the cation in HEDYIY at the RI-B3LYP/def2-TZVP level of theory

| $\rho (^\circ)$                                   | 47.4 | 1.1 <sup>a)</sup> | 21.9  | 50.3 | 59.4 <sup>a)</sup> |
|---------------------------------------------------|------|-------------------|-------|------|--------------------|
| relative energy / $\text{kJ}\cdot\text{mol}^{-1}$ | 0    | 24.31             | 13.50 | 0.75 | 4.66               |

a) Two torsion angles have been fixed ( $\text{C}_i\text{-P-Ru-C71}$  and  $\text{C}_i\text{-P-Ru-C75}$ ).

**Table S7.** Cartesian coordinates of the optimized geometry of the cation in HEDYIY at the RI-B3LYP/def2-TZVP level of theory. Total Energy: -2072.84032804932 a.u.

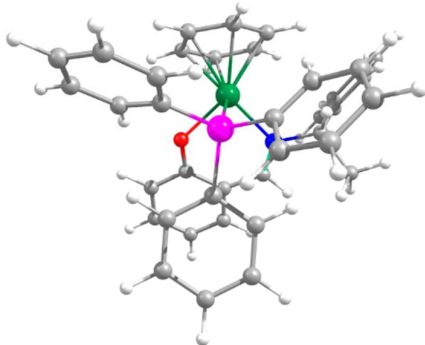

| Atom | x          | y          | z         |
|------|------------|------------|-----------|
| Ru   | -2.1321834 | -0.0994331 | 7.9225526 |
| P    | -4.4213110 | -0.2845909 | 8.6564295 |
| O    | -2.9155617 | 1.4031439  | 6.7472479 |
| N    | -2.5019374 | -1.4633959 | 6.3391995 |
| C    | -2.8328183 | -1.0779682 | 5.1478912 |
| H    | -2.9413078 | -1.8522739 | 4.3934321 |
| C    | -2.2608573 | -2.9246020 | 6.5447783 |
| H    | -2.4864567 | -3.0991544 | 7.5945122 |
| C    | -3.1832039 | -3.8495772 | 5.7322072 |
| H    | -4.2299675 | -3.5632374 | 5.8306111 |
| H    | -3.0701536 | -4.8648483 | 6.1128051 |
| H    | -2.9230185 | -3.8795409 | 4.6741905 |

|   |            |            |            |
|---|------------|------------|------------|
| C | -6.3149936 | 1.0888780  | 7.0362961  |
| H | -6.0830133 | 1.9812979  | 7.5975746  |
| C | -7.2560621 | 1.1641099  | 6.0153843  |
| H | -7.7307615 | 2.1123744  | 5.7982269  |
| C | -7.5913793 | 0.0322354  | 5.2838287  |
| H | -8.3273844 | 0.0931327  | 4.4924805  |
| C | -6.9832433 | -1.1825170 | 5.5814185  |
| H | -7.2475412 | -2.0740805 | 5.0267922  |
| C | -6.0422629 | -1.2589429 | 6.5989159  |
| H | -5.5996246 | -2.2167217 | 6.8341017  |
| C | -5.6940567 | -0.1243882 | 7.3402767  |
| C | -5.2993060 | 0.8416677  | 11.1165303 |
| H | -5.5371242 | -0.1626400 | 11.4363452 |
| C | -5.5277590 | 1.8992348  | 11.9929892 |
| H | -5.9371215 | 1.6981672  | 12.9748027 |
| C | -5.2373804 | 3.2018645  | 11.6109267 |
| H | -5.4219883 | 4.0231143  | 12.2915342 |
| C | -4.7022981 | 3.4454501  | 10.3489846 |
| H | -4.4695018 | 4.4582436  | 10.0445703 |
| C | -4.4600745 | 2.3935383  | 9.4756574  |
| H | -4.0188612 | 2.5903919  | 8.5069538  |
| C | -4.7698746 | 1.0759053  | 9.8451508  |
| C | -6.3026140 | -2.0586294 | 9.7678265  |
| H | -7.0496433 | -1.3600001 | 9.4152180  |
| C | -6.7079634 | -3.1948219 | 10.4545207 |
| H | -7.7622897 | -3.3649540 | 10.6314802 |
| C | -5.7657513 | -4.1117570 | 10.9114712 |
| H | -6.0843614 | -4.9981835 | 11.4448237 |
| C | -4.4159640 | -3.8860323 | 10.6760181 |
| H | -3.6771522 | -4.5964904 | 11.0246844 |
| C | -4.0101624 | -2.7463123 | 9.9882910  |
| H | -2.9581217 | -2.5873515 | 9.8025985  |
| C | -4.9429255 | -1.8161375 | 9.5277491  |
| C | -0.0549265 | -2.8627976 | 5.2408381  |
| H | -0.4703580 | -2.1309908 | 4.5598561  |
| C | 1.2452863  | -3.3119040 | 5.0329202  |
| H | 1.8144325  | -2.9338226 | 4.1929848  |
| C | 1.8128355  | -4.2441101 | 5.8951187  |

|   |            |            |            |
|---|------------|------------|------------|
| H | 2.8241287  | -4.5932668 | 5.7317058  |
| C | 1.0684782  | -4.7283668 | 6.9648824  |
| H | 1.4966991  | -5.4602086 | 7.6381676  |
| C | -0.2300994 | -4.2748589 | 7.1706824  |
| H | -0.8052113 | -4.6682979 | 8.0022862  |
| C | -0.8079735 | -3.3334180 | 6.3172142  |
| C | -3.0767537 | 1.4073608  | 5.4517543  |
| C | -3.2980699 | 2.6499849  | 4.8141306  |
| H | -3.2982318 | 3.5400610  | 5.4299174  |
| C | -3.5124739 | 2.7278879  | 3.4561160  |
| H | -3.6791137 | 3.6969431  | 3.0011646  |
| C | -3.5188205 | 1.5748521  | 2.6551655  |
| H | -3.6903809 | 1.6461799  | 1.5901269  |
| C | -3.3023290 | 0.3573927  | 3.2515826  |
| H | -3.3033989 | -0.5452191 | 2.6506617  |
| C | -3.0671070 | 0.2381876  | 4.6426896  |
| C | -1.3587439 | 1.0244702  | 9.7482337  |
| H | -1.9284407 | 1.6865296  | 10.3818501 |
| C | -0.7127093 | 1.5152029  | 8.6095159  |
| H | -0.8224765 | 2.5568759  | 8.3418921  |
| C | 0.0462191  | 0.6545982  | 7.7670832  |
| H | 0.5413800  | 1.0475600  | 6.8910194  |
| C | 0.1068669  | -0.7091986 | 8.0660267  |
| H | 0.6490295  | -1.3776903 | 7.4142008  |
| C | -0.6001666 | -1.2398526 | 9.1762398  |
| H | -0.5551705 | -2.2982392 | 9.3851650  |
| C | -1.3380080 | -0.3735075 | 10.0045178 |
| H | -1.8769491 | -0.7656839 | 10.8558060 |

---

**Table S8.** Cartesian coordinates of the optimized geometry of the cation in HEDYOE at the RI-B3LYP/def2-TZVP level of theory. Total Energy: -2072.84135001407 a.u.

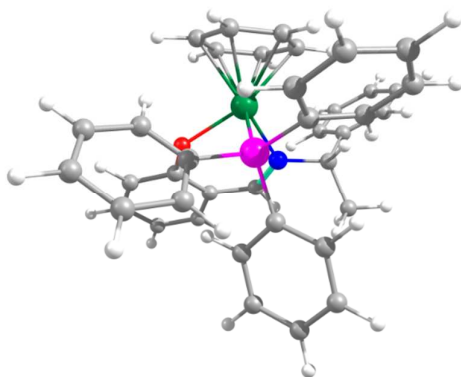

| Atom | x          | y          | z          |
|------|------------|------------|------------|
| Ru   | -0.5551222 | -1.1941653 | 0.5615494  |
| P    | 0.0320906  | 1.0298932  | 1.2898331  |
| O    | 1.3858732  | -1.6691813 | 1.0689390  |
| N    | 0.1554937  | -0.8071572 | -1.4030076 |
| C    | 1.2962526  | -1.2382870 | -1.8341565 |
| H    | 1.5322560  | -1.0528286 | -2.8787207 |
| C    | -0.7282327 | -0.1167501 | -2.3880857 |
| H    | -1.3894057 | 0.4994134  | -1.7820352 |
| C    | 0.0191799  | 0.8316832  | -3.3411411 |
| H    | 0.6900326  | 1.4927531  | -2.7928450 |
| H    | -0.7143416 | 1.4429141  | -3.8676767 |
| H    | 0.5860587  | 0.2968609  | -4.1031982 |
| C    | 0.7274168  | 3.2823365  | -0.3308506 |
| H    | -0.2420031 | 3.7041520  | -0.1085037 |
| C    | 1.6123453  | 4.0102708  | -1.1219551 |
| H    | 1.3108137  | 4.9751702  | -1.5094588 |
| C    | 2.8768933  | 3.5093507  | -1.4018058 |
| H    | 3.5651309  | 4.0793709  | -2.0127946 |
| C    | 3.2598436  | 2.2759917  | -0.8817345 |
| H    | 4.2484149  | 1.8832638  | -1.0830562 |
| C    | 2.3801205  | 1.5466575  | -0.0945880 |

|   |            |            |            |
|---|------------|------------|------------|
| H | 2.6995003  | 0.5995096  | 0.3184204  |
| C | 1.0996706  | 2.0393929  | 0.1860086  |
| C | 1.5515343  | 2.2962222  | 3.2744268  |
| H | 1.4784379  | 3.1756101  | 2.6479321  |
| C | 2.2299054  | 2.3808542  | 4.4821162  |
| H | 2.6726854  | 3.3217303  | 4.7829740  |
| C | 2.3450957  | 1.2599584  | 5.2990620  |
| H | 2.8787022  | 1.3257383  | 6.2386890  |
| C | 1.7830967  | 0.0547860  | 4.8986347  |
| H | 1.8834901  | -0.8247229 | 5.5218584  |
| C | 1.1010517  | -0.0320404 | 3.6889638  |
| H | 0.7060024  | -0.9828316 | 3.3687635  |
| C | 0.9697355  | 1.0882293  | 2.8678977  |
| C | -1.8142429 | 2.4526199  | 2.9025875  |
| H | -1.1747467 | 2.2115474  | 3.7398768  |
| C | -2.9848975 | 3.1722708  | 3.1295323  |
| H | -3.2381631 | 3.4727884  | 4.1382448  |
| C | -3.8177229 | 3.5096309  | 2.0714583  |
| H | -4.7234458 | 4.0751484  | 2.2487586  |
| C | -3.4802749 | 3.1163014  | 0.7791600  |
| H | -4.1216817 | 3.3772567  | -0.0531910 |
| C | -2.3200249 | 2.3884459  | 0.5535062  |
| H | -2.0817248 | 2.0851762  | -0.4578798 |
| C | -1.4628671 | 2.0532532  | 1.6106491  |
| C | -2.8989448 | -0.6399451 | -3.5424255 |
| H | -3.2521791 | 0.3292792  | -3.2059821 |
| C | -3.7276703 | -1.4288376 | -4.3315908 |
| H | -4.7154987 | -1.0739662 | -4.5970714 |
| C | -3.2872957 | -2.6694783 | -4.7795615 |
| H | -3.9288617 | -3.2868240 | -5.3947934 |
| C | -2.0145613 | -3.1075972 | -4.4336803 |
| H | -1.6593161 | -4.0695852 | -4.7814384 |
| C | -1.1867874 | -2.3137228 | -3.6445731 |
| H | -0.2019870 | -2.6824133 | -3.3885903 |
| C | -1.6181007 | -1.0691896 | -3.1855155 |
| C | 2.3139461  | -2.1344362 | 0.2769671  |
| C | 3.4028179  | -2.8259440 | 0.8565199  |
| H | 3.3996642  | -2.9627382 | 1.9299633  |

|   |            |            |            |
|---|------------|------------|------------|
| C | 4.4388678  | -3.3007657 | 0.0823042  |
| H | 5.2573885  | -3.8265916 | 0.5590411  |
| C | 4.4528809  | -3.1120816 | -1.3088886 |
| H | 5.2722205  | -3.4875483 | -1.9060436 |
| C | 3.4097516  | -2.4362171 | -1.8934771 |
| H | 3.4062492  | -2.2702925 | -2.9651444 |
| C | 2.3223430  | -1.9455346 | -1.1325298 |
| C | -1.2238944 | -3.3750071 | 0.8807182  |
| H | -0.6170462 | -4.2600509 | 0.7507614  |
| C | -1.2035783 | -2.6762816 | 2.1255247  |
| H | -0.5722978 | -3.0378008 | 2.9249808  |
| C | -1.9664195 | -1.5174963 | 2.3041010  |
| H | -1.9576887 | -0.9984182 | 3.2518435  |
| C | -2.7164724 | -0.9973353 | 1.2093076  |
| H | -3.2726515 | -0.0793406 | 1.3260388  |
| C | -2.7047185 | -1.6562176 | -0.0248728 |
| H | -3.2579358 | -1.2566521 | -0.8613320 |
| C | -1.9702107 | -2.8698570 | -0.1804714 |
| H | -1.9502401 | -3.3597009 | -1.1432470 |

---

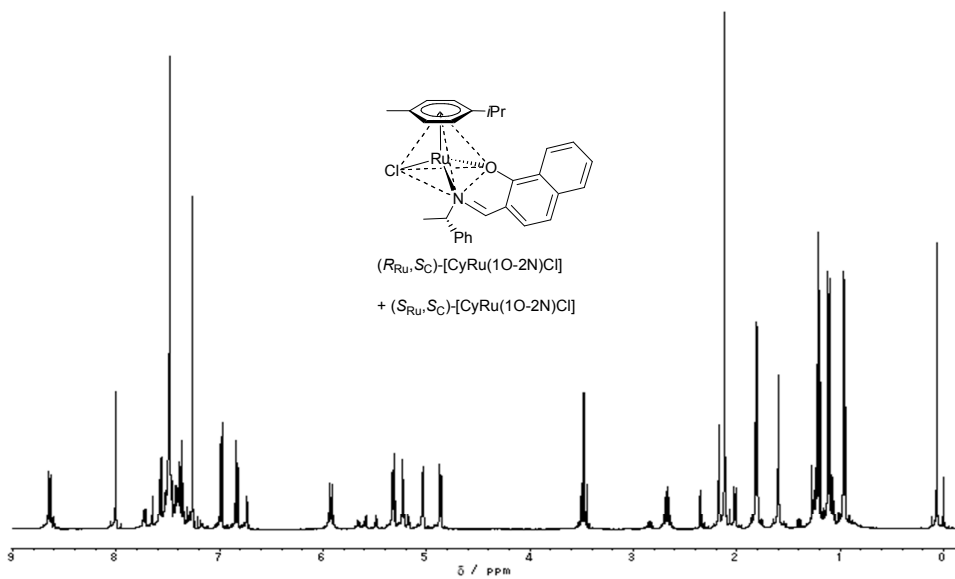

**Figure S1.**  $^1\text{H}$  NMR spectrum of  $(R_{Ru,S_C})/(S_{Ru,S_C})\text{-[CyRu(1O-2N)Cl]}$  in  $\text{CDCl}_3$ .

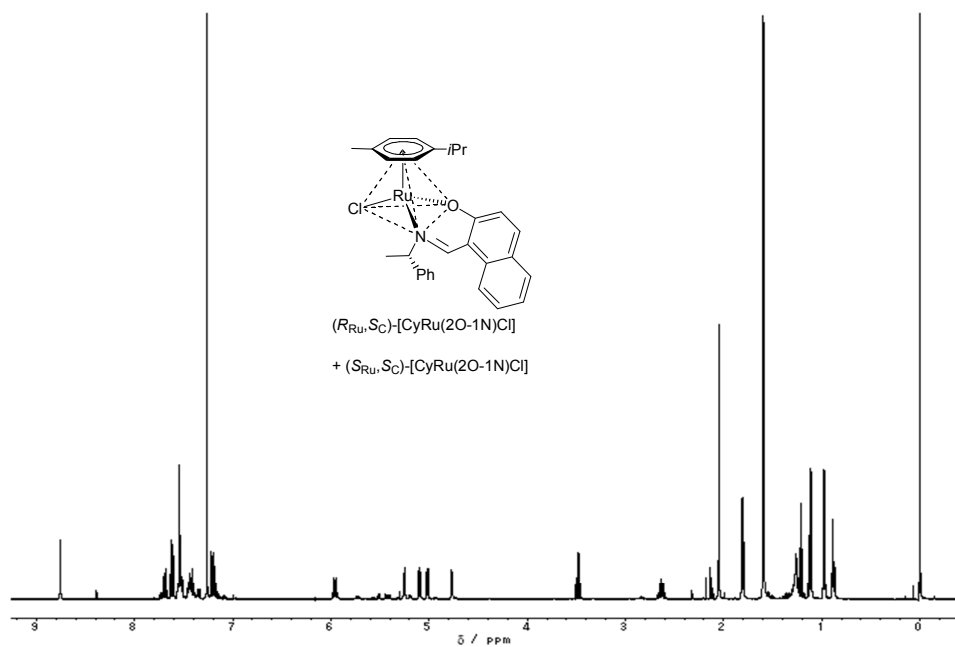

**Figure S2.**  $^1\text{H}$  NMR spectrum of  $(R_{Ru,S_C})/(S_{Ru,S_C})\text{-[CyRu(2O-1N)Cl]}$  in  $\text{CDCl}_3$ .

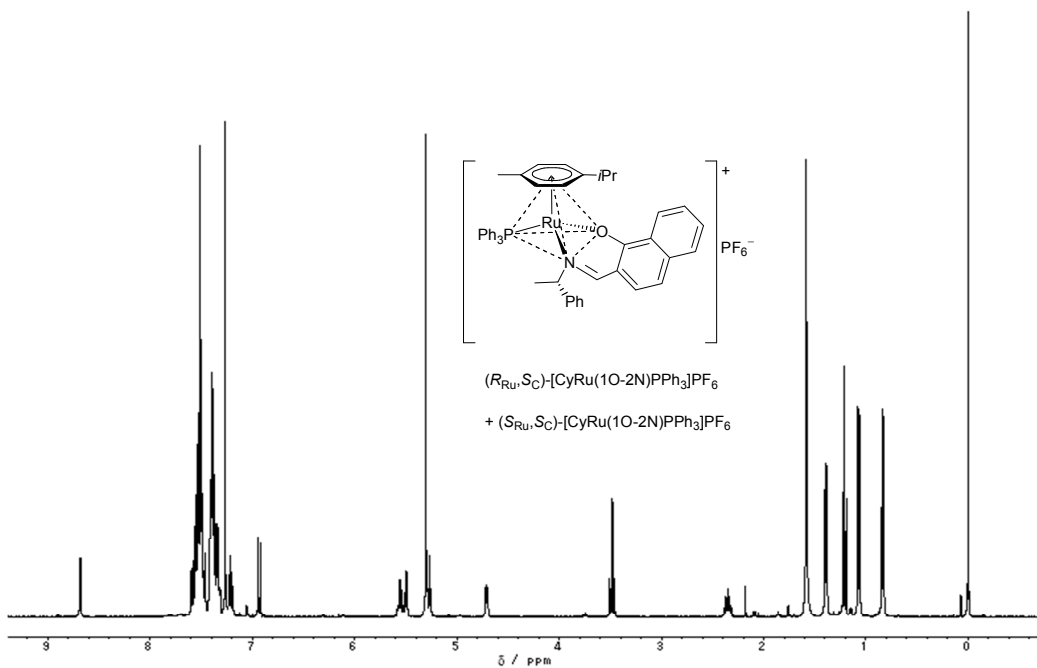

**Figure S3.**  $^1\text{H}$  NMR spectrum of  $(R_{Ru,S_C})/(S_{Ru,S_C})\text{-[CyRu(1O-2N)PPh}_3\text{]PF}_6$  in  $\text{CDCl}_3$ .

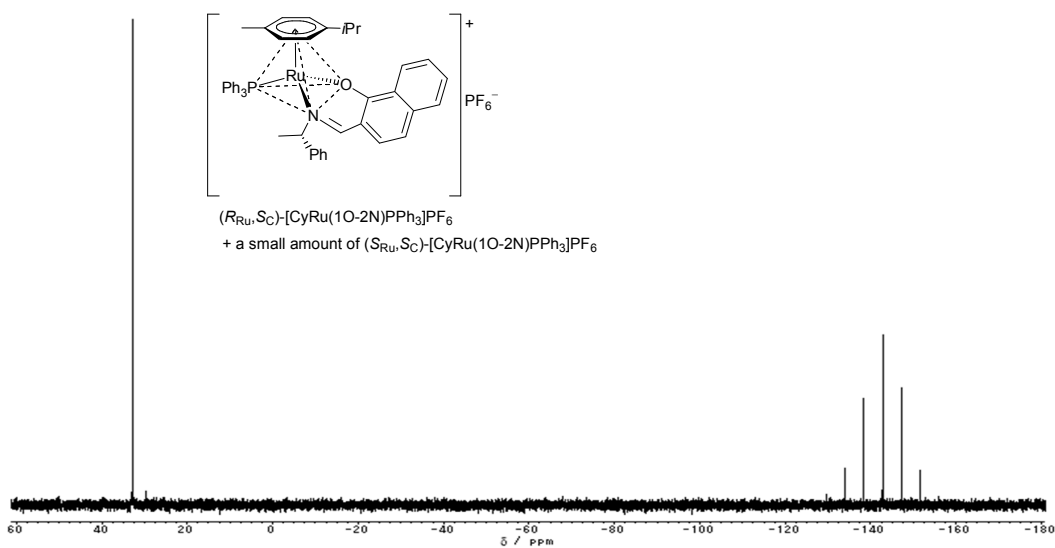

**Figure S4.**  $^{31}\text{P}\{^1\text{H}\}$  NMR spectrum of  $(R_{Ru,S_C})\text{-[CyRu(1O-2N)PPh}_3\text{]PF}_6$  and a small amount of  $(S_{Ru,S_C})\text{-[CyRu(1O-2N)PPh}_3\text{]PF}_6$  in  $\text{CDCl}_3$ .



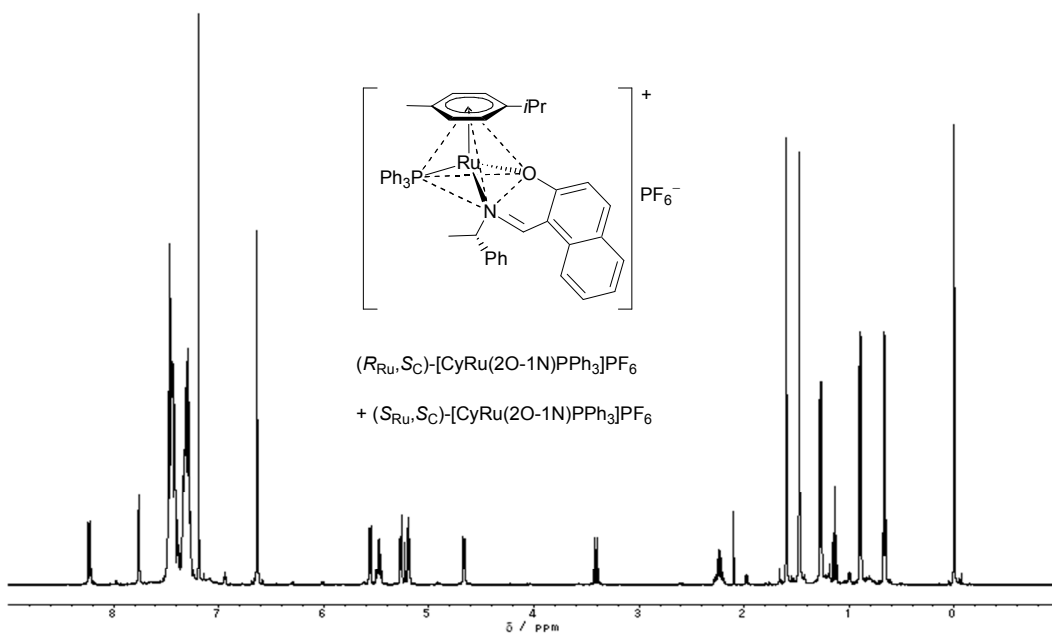

**Figure S5.**  $^1\text{H}$  NMR spectrum of  $(R_{Ru,S_C})\text{-[CyRu(2O-1N)PPh}_3\text{]PF}_6$  in  $\text{CDCl}_3$ .

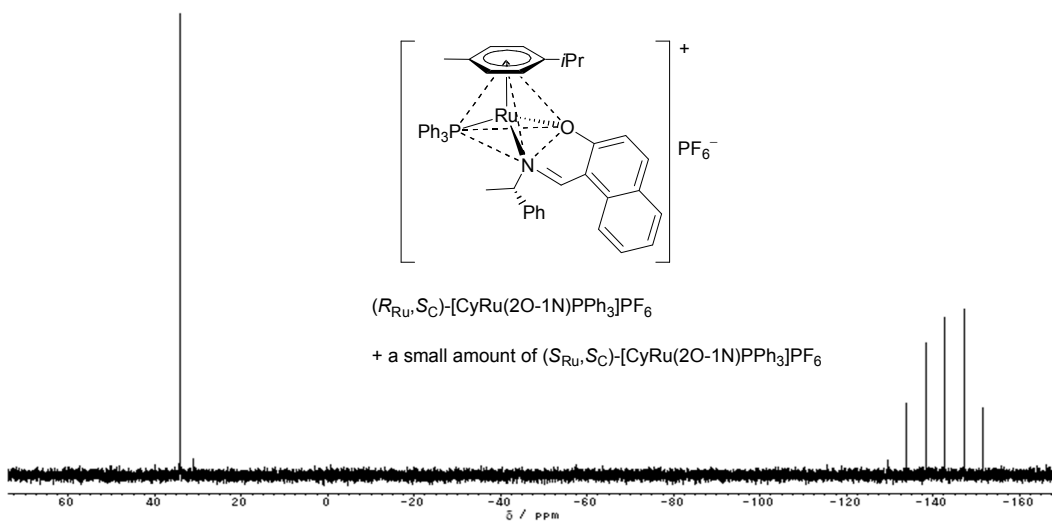

**Figure S6.**  $^{31}\text{P}\{^1\text{H}\}$  NMR spectrum of  $(R_{Ru,S_C})\text{-[CyRu(2O-1N)PPh}_3\text{]PF}_6$  and a small amount of  $(S_{Ru,S_C})\text{-[CyRu(2O-1N)PPh}_3\text{]PF}_6$  in  $\text{CDCl}_3$ .

## REFERENCES

1. Brunner, H.; Oeschey, R.; Nuber, B. *Angew. Chem., Int. Ed. Engl.* **1994**, *33*, 866-868.
2. Stolz, F.; Strazewski, P.; Tamm, C.; Neuberger, M.; Zehnder, M. *Angew. Chem., Int. Ed.* **1992**, *31*, 193-195.
3. Bruce, M. I.; Liddell, M. J.; Snow, M. R.; Tiekink, E. E. T. *J. Organomet. Chem.* **1988**, *354*, 103-115.
4. Cagle, P. C.; Meyer, O.; Weickhardt, K.; Arif, A. M.; Gladysz, J. A. *J. Am. Chem. Soc.* **1995**, *117*, 11730-11744.
5. Nakazawa, H.; Itazaki, M.; Owaribe, M. *Acta Crystallogr., Sect. E: Struct. Rep. Online* **2005**, *61*, m1166-m1168.
6. Chou, C.-K.; Miles, D. L.; Bau, R.; Flood, T. C. *J. Am. Chem. Soc.* **1978**, *100*, 7271-7278.
7. Kulawiec, R. J.; Faller, J. W.; Crabtree, R. H. *Organometallics* **1990**, *9*, 745-755.
